# Supplementary material for: Supramolecular architectures of N,N,N′,N′-tetrakis-(2-hydroxyethyl)ethylenediamine and tris(2-hydroxyethyl)amine with La(iii) picrate
Source: Royal Society of Chemistry journal article supplement (doi:10.1039/c4ra05835f), 2014-11-11
Supplement: c4ra05835f1.pdf [file c4ra05835f1.pdf]

## Supporting Information

belonging to manuscript

### Supramolecular architectures of *N,N,N',N'*-tetrakis (2-hydroxyethyl) ethylenediamine and tris(2-hydroxyethyl)amine with La(III) picrate and picric acid

Rakesh Kumar <sup>a</sup>, Sangeeta Obrai <sup>a,\*</sup>, Amanpreet Kaur <sup>b</sup>, Maninder Singh Hundal <sup>b,\*</sup>

<sup>a</sup>Department of Chemistry, Dr B R Ambedkar National Institute of Technology, Jalandhar -144011(Punjab) INDIA

<sup>b</sup>Department of Chemistry, Guru Nanak Dev University, Amritsar, Punjab 143005, INDIA

### Contents

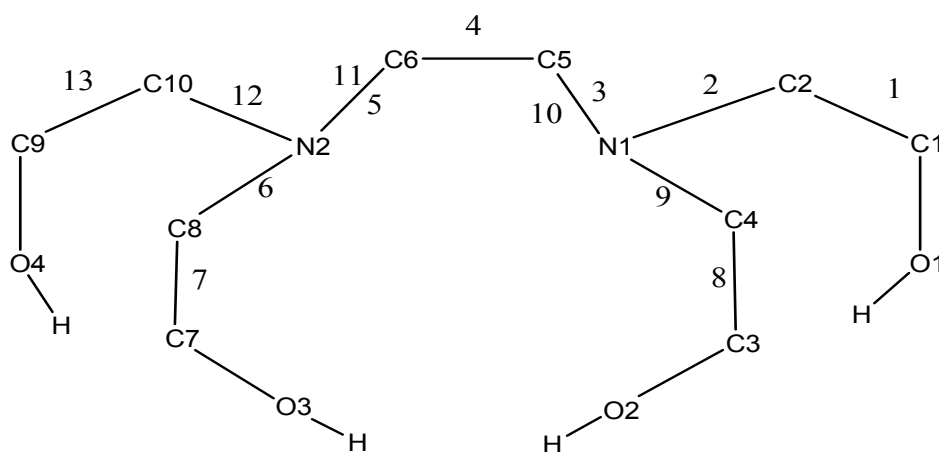

Fig. S1 THEEN

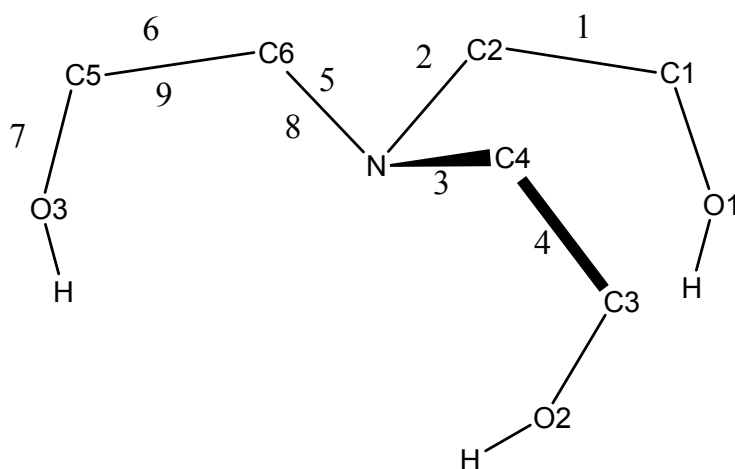

Fig. S2 TEAH<sub>3</sub>

**Table S1**

Experimental and optimized bond lengths (Å) and angles (°) for compound (1)

| Bond distances (Å) | Cal.  | Exp.  | Dev.   | Bond angles (°) | Cal.   | Exp.   | Dev.  |
|--------------------|-------|-------|--------|-----------------|--------|--------|-------|
| Picrate anion (1)  |       |       |        | Compound (1)    |        |        |       |
| C6-C7              | 1.459 | 1.458 | 0.001  | C4- N1 -C2      | 108.70 | 110.64 | -1.94 |
| C7-C8              | 1.386 | 1.385 | 0.001  | C1 -C2 -N1      | 117.20 | 111.16 | 6.04  |
| C8-C9              | 1.389 | 1.385 | 0.004  | O1- C1- C2      | 116.30 | 112.80 | 3.50  |
| C9-C10             | 1.395 | 1.401 | -0.006 | C3 -C4 -N1      | 116.00 | 114.20 | 2.09  |
| C10-C11            | 1.382 | 1.398 | -0.016 | O2- C3 -C4      | 109.10 | 109.93 | -0.83 |
| C6-O3              | 1.258 | 1.274 | -0.016 | N1- C5 -C5      | 113.80 | 112.23 | 1.57  |
| C7-N2              | 1.451 | 1.481 | -0.030 | O4 -N2- O5      | 122.70 | 123.30 | -0.60 |
| N2-O4              | 1.241 | 1.210 | 0.031  | O3 -C6 -C7      | 124.20 | 123.04 | 1.16  |
| N2-O5              | 1.234 | 1.227 | 0.006  | O3- C6 -C11     | 123.30 | 124.04 | -0.74 |
| C9-N3              | 1.450 | 1.460 | -0.010 | C7 -C6-C11      | 112.40 | 112.21 | 0.19  |
| N3-O6              | 1.235 | 1.242 | -0.007 | C8 -C7-C6       | 123.80 | 124.28 | -0.48 |
| N3-O7              | 1.234 | 1.237 | -0.003 | C8 -C7- N2      | 116.30 | 116.11 | 0.19  |
| C11-N4             | 1.457 | 1.467 | -0.010 | C6 -C7-N2       | 120.00 | 119.94 | 0.06  |
| N4 -O8             | 1.234 | 1.245 | -0.011 | C7- C8 -C9      | 119.50 | 119.21 | 0.29  |
| N4-O9              | 1.236 | 1.241 | -0.005 | C8 -C9-C10      | 120.80 | 122.04 | -1.24 |
| THEEN              |       |       |        | C8- C9- N3      | 119.50 | 118.48 | 1.02  |
| C1-C2              | 1.545 | 1.531 | 0.014  | C10- C9 -N3     | 119.60 | 119.82 | -0.22 |
| C3-C4              | 1.523 | 1.526 | -0.003 | C11-C10- C9     | 119.90 | 117.99 | 1.91  |
| N1-C2              | 1.528 | 1.531 | -0.003 | C10 -C11-C6     | 123.40 | 124.84 | -1.44 |
| N1-C5              | 1.513 | 1.518 | -0.005 | C10 -C11-N4     | 116.00 | 116.55 | -0.55 |
| N1-C4              | 1.514 | 1.526 | -0.012 | C6- C11-N4      | 120.60 | 118.91 | 1.69  |
| C1-O1              | 1.406 | 1.435 | -0.029 |                 |        |        |       |
| C3-O2              | 1.424 | 1.433 | -0.009 |                 |        |        |       |

**Table S2**

Comparison of selected experimental and calculated geometric parameters bond lengths (Å) and bond angles (°) for compound (2).

| Bond length (Å)      | Cal.  | Exp.  | Dev.   | Bond angles (°)     | Cal.   | Exp.   | Dev.  |
|----------------------|-------|-------|--------|---------------------|--------|--------|-------|
| <b>Picrate anion</b> |       |       |        | <b>Compound (2)</b> |        |        |       |
| C7-C8                | 1.462 | 1.448 | 0.014  | O1- C1- C2          | 112.10 | 111.07 | 1.03  |
| C8-C9                | 1.382 | 1.370 | 0.012  | O2 -C3 -C4          | 111.40 | 107.88 | 3.52  |
| C9-C10               | 1.393 | 1.387 | 0.006  | O3- C5 -C6          | 109.00 | 110.77 | -1.77 |
| C10-C11              | 1.395 | 1.377 | 0.018  | O4 -C7 -C12         | 124.50 | 125.98 | -1.48 |
| C11-C12              | 1.382 | 1.372 | 0.001  | O4 -C7- C8          | 123.10 | 122.77 | 0.33  |
| O4-C7                | 1.253 | 1.267 | -0.014 | O5- N2 -O6          | 122.90 | 122.98 | -0.07 |
| C8-N2                | 1.450 | 1.460 | -0.010 | O5 -N2 -C8          | 118.60 | 119.25 | -0.65 |
| N2-O5                | 1.242 | 1.232 | 0.010  | O6 -N2 -C8          | 118.50 | 118.15 | 0.34  |
| N2-O6                | 1.233 | 1.243 | -0.010 | O7- N3- O8          | 124.50 | 124.01 | 0.49  |
| C10-N3               | 1.453 | 1.466 | -0.012 | O7 -N3- C10         | 117.70 | 117.54 | 0.16  |
| N3-O7                | 1.235 | 1.228 | 0.007  | O8- N3 -C10         | 117.80 | 118.94 | -1.14 |
| N3-O8                | 1.234 | 1.232 | 0.002  | O9 -N4- C12         | 118.00 | 118.65 | -0.65 |
| C12-N4               | 1.458 | 1.459 | -0.001 | O10 -N4- O9         | 123.40 | 121.98 | 1.42  |
| N4- O9               | 1.233 | 1.211 | 0.022  | O10- N4- C12        | 118.60 | 119.77 | -1.17 |
| N4-O10               | 1.237 | 1.208 | 0.029  | C2- N1- C4          | 113.70 | 114.34 | -0.64 |
| TEA                  |       |       |        | C2- N1 -C6          | 113.50 | 111.76 | 1.74  |
| N1-C2                | 1.520 | 1.519 | 0.001  | C3 -C4 -N1          | 111.70 | 112.46 | -0.76 |
| N1-C4                | 1.504 | 1.518 | -0.014 | C4- N1 -C6          | 112.70 | 110.75 | 1.95  |
| N1-C6                | 1.518 | 1.526 | -0.008 | C5 -C6 -N1          | 107.30 | 111.39 | -4.09 |
| C1-O1                | 1.437 | 1.417 | 0.020  | C9 -C8 -C7          | 123.80 | 125.30 | -1.50 |
| C3-O2                | 1.407 | 1.413 | -0.006 | C12 -C7 -C8         | 112.30 | 111.66 | 0.64  |
| C5-O3                | 1.412 | 1.413 | -0.001 | N1- C2 -C1          | 111.10 | 109.18 | 1.92  |
| C1-C2                | 1.525 | 1.516 | 0.008  |                     |        |        |       |
| C3 -C4               | 1.535 | 1.502 | 0.033  |                     |        |        |       |
| C5-C6                | 1.541 | 1.525 | 0.016  |                     |        |        |       |

**Table S3**

Theoretical and experimental hydrogen bond lengths ( Å ) and bond angles ( ° ) in the compounds (1) and (2)

| Hydrogen bonding geometry ( Theoretical) |        |        |        |         | Hydrogen bonding geometry (Experimental) |        |        |         |
|------------------------------------------|--------|--------|--------|---------|------------------------------------------|--------|--------|---------|
| D-H...A                                  | d(D-H) | d(H-A) | d(D-A) | ∠ (DHA) | d(D-H)                                   | d(H-A) | d(D-A) | ∠ (DHA) |
| Compound (1)                             |        |        |        |         |                                          |        |        |         |
| N1 -H1C...O1                             | 1.053  | 2.971  | 4.030  | 80.22   | 0.91                                     | 2.557  | 2.882  | 101.57  |
| O1 -H1...O3                              | 0.98   | 2.085  | 3.065  | 128.66  | 0.82                                     | 1.875  | 2.677  | 165.09  |
| O1 -H1...O9                              | 0.98   | 1.943  | 2.923  | 146.61  | 0.82                                     | 2.580  | 3.087  | 121.19  |
| Compound (2)                             |        |        |        |         |                                          |        |        |         |
| N1 -H1C...O1                             | 1.046  | 2.674  | 3.720  | 99.04   | 0.84                                     | 2.263  | 2.770  | 118.47  |
| N1 -H1C...O2                             | 1.046  | 2.434  | 3.480  | 104.15  | 0.84                                     | 2.423  | 2.831  | 110.25  |
| N1 -H1C...O3                             | 1.046  | 1.915  | 2.961  | 123.49  | 0.84,                                    | 2.484  | 2.918  | 111.15  |
| O3 -H3...O4                              | 0.98   | 1.859  | 2.839  | 141.76  | 0.82                                     | 1.921  | 2.737  | 171.87  |
| O3 -H3...O10                             | 0.98   | 2.177  | 3.157  | 127.09  | 0.82                                     | 2.606  | 3.077  | 117.73  |
